# Supplementary material
Source: publisher figshare collection journal article supplement (https://frontiersin.figshare.com/ndownloader/files/26652602)
Supplement: Supplementary file [file 26652602]

## Supplementary Results

### Supplementary Figure1 Structure of Compounds

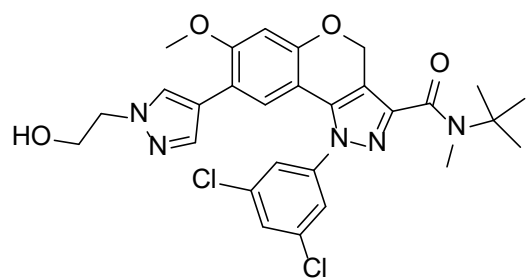

TOP05300

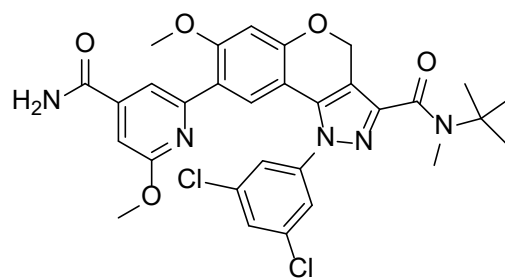

TOP5668

**Supplementary Figure 2. TOP5300 stimulates similar follicular growth whether administered twice per day (BID) or once per day (QD) by oral gavage.** rh-FSH was administered by subcutaneous injection twice daily. Stimulation of follicular growth was measured by the ability of hCG to induce ovulation of mature follicles and the recovery of cumulus-enclosed oocytes from the oviduct 16-18 hours after injection of hCG. Data is mean $\pm$ SEM, n=2-3 expts. with 5 animals/group/expt. \*p<0.05 vs 0.29IU FSH, ANOVA

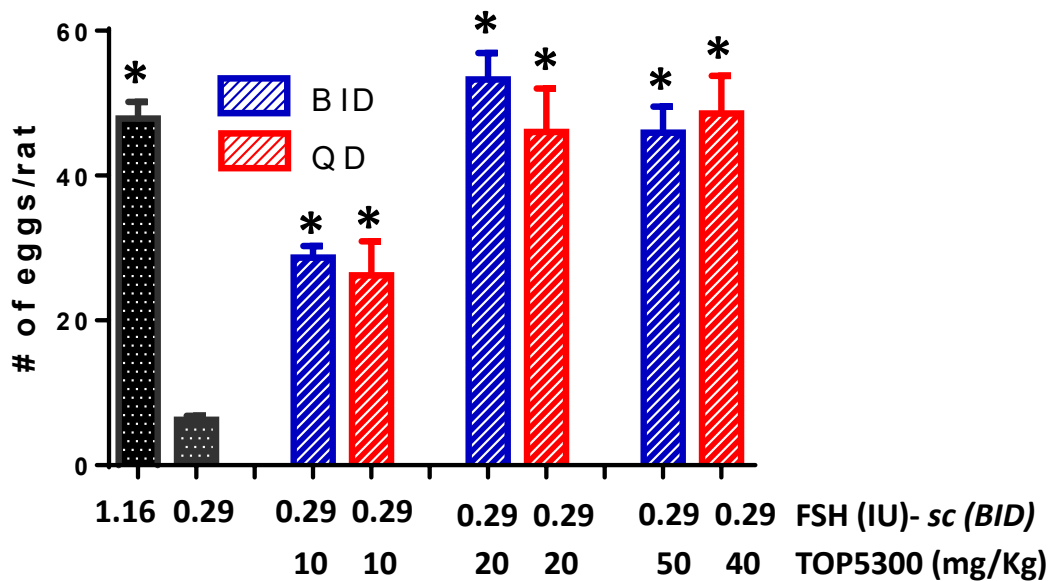

**Supplementary Figure 3: Toxicokinetic (TK) profile of TOP5300 in rat treated for 14-days.**  
Data is mean+SD, n=3 animals/timepoint

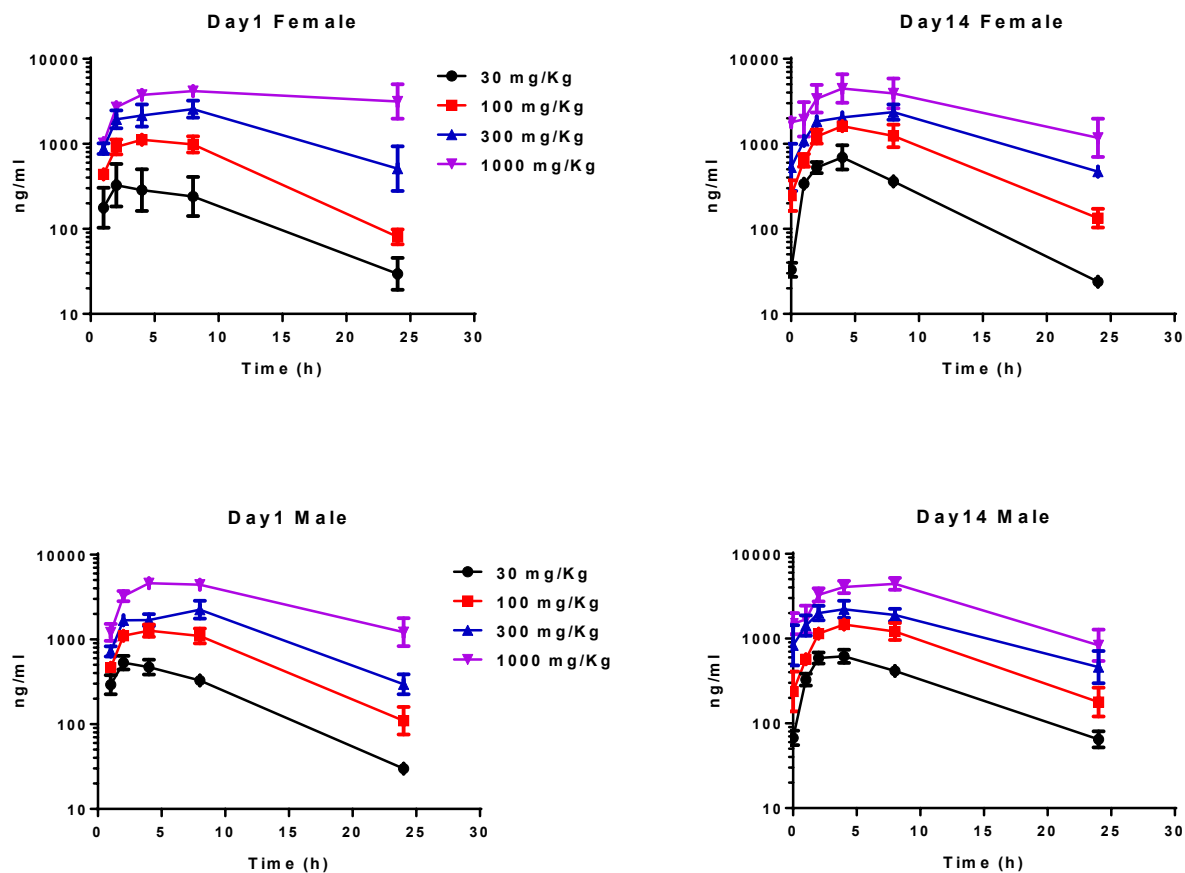

**Supplementary Table 1: Broad safety and selectivity profile of TOP5300.**

| Assay name                                            | Assay content                                                                  | Result                                                                                             |
|-------------------------------------------------------|--------------------------------------------------------------------------------|----------------------------------------------------------------------------------------------------|
| hERG channel inhibition @ 10 uM [Cyprotex]            | hERG                                                                           | 16 % inhibition – No significant effect                                                            |
| Gentotoxcity test                                     | Ames test                                                                      | Negative                                                                                           |
| Chromosomal Aberrations [Cyprotex]                    | Micronucleus Test (MNT)                                                        | Negative                                                                                           |
| Phosphodiesterase (PDE) profile @ 10 uM [Eurofins]    | Tested against 9 isoforms PDE                                                  | No significant inhibition on any isoform                                                           |
| Kinase profile@ 10 uM [Eurofins]                      | Tested against 211 kinases                                                     | No significant inhibition on any target                                                            |
| Single concentration Cerep profile @ 10 uM [Eurofins] | Tested against 55 targets,                                                     | 52 targets < 60%<br>3 targets > 60% inhibition                                                     |
| Concentration response curve [Eurofins]               | Dose response tests against 3 targets (A3(h), NK2(h), Cl-channel (GABA-gated)) | Good safety margin compared to FSHR; safety margin > 400 X for all three targets compared to FSHR) |

**Supplementary Table 2. Serum level of thyroid hormone (Free T3, Free T4 & TSH) in beagle dogs treated with TOP5300 for 14 days, A-female dog and B-male dog.** Hormone levels were measured predosing (0hr), 24h after 1<sup>st</sup> dosing (24h) and 24hr following the 13<sup>th</sup> dose (Day14). The values are normalized to vehicle treated animals (0 mg/Kg). Data is mean of n=2/sex/dose group.

**A**

| Dose<br>mg/Kg | Free T3                           |     |        |  | Free T4                           |     |        |  | TSH                               |     |        |
|---------------|-----------------------------------|-----|--------|--|-----------------------------------|-----|--------|--|-----------------------------------|-----|--------|
|               | Fold change over vehicle<br>group |     |        |  | Fold change over vehicle<br>group |     |        |  | Fold change over vehicle<br>group |     |        |
|               | 0h                                | 24h | Day 14 |  | 0h                                | 24h | Day 14 |  | 0h                                | 24h | Day 14 |
| 0             | 1                                 | 1   | 1      |  | 1                                 | 1   | 1      |  | 1                                 | 1   | 1      |
| 30            | 0.9                               | 0.8 | 1.0    |  | 1.1                               | 1.1 | 0.8    |  | 1.2                               | 0.9 | 1.1    |
| 100           | 1.0                               | 0.9 | 1.1    |  | 1.2                               | 1.1 | 1.1    |  | 1.3                               | 1.0 | 1.1    |
| 1000          | 1.1                               | 0.9 | 1.2    |  | 1.0                               | 0.9 | 0.9    |  | 1.2                               | 0.8 | 0.8    |

**B**

| Dose<br>mg/Kg | Free T3                           |     |        |  | Free T4                           |     |        |  | TSH                               |     |        |
|---------------|-----------------------------------|-----|--------|--|-----------------------------------|-----|--------|--|-----------------------------------|-----|--------|
|               | Fold change over vehicle<br>group |     |        |  | Fold change over vehicle<br>group |     |        |  | Fold change over vehicle<br>group |     |        |
|               | 0h                                | 24h | Day 14 |  | 0h                                | 24h | Day 14 |  | 0h                                | 24h | Day 14 |
| 0             | 1                                 | 1   | 1      |  | 1                                 | 1   | 1      |  | 1                                 | 1   | 1      |
| 30            | 1.3                               | 1.3 | 1.3    |  | 1.0                               | 1.0 | 1.0    |  | 0.8                               | 0.9 | 1.0    |
| 100           | 1.1                               | 1.1 | 1.1    |  | 0.9                               | 0.8 | 0.9    |  | 0.8                               | 0.9 | 1.0    |
| 1000          | 1.0                               | 0.9 | 1.0    |  | 0.9                               | 0.9 | 1.0    |  | 0.7                               | 0.9 | 0.8    |
